# Supplementary material for: Synaptic input and temperature influence sensory coding in a mechanoreceptor
Source: Frontiers journal article supplement (doi:10.3389/fncel.2023.1233730), 2023-09-12
Supplement: Image_1.pdf [file Image_1.pdf]

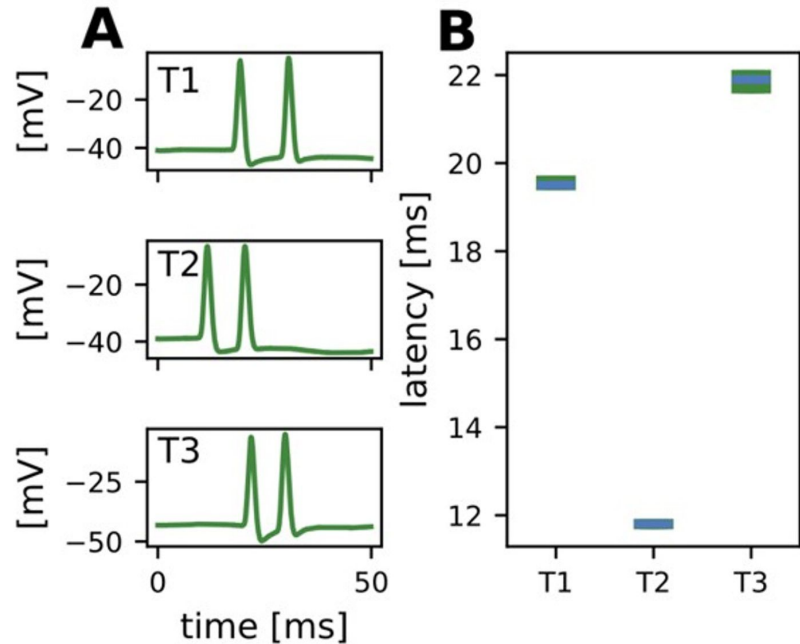

**Supplementary Figure 1:** Tactile stimulation at the same location ( $90^\circ$ ) elicited spikes in all three ipsilateral T cells. **(A)** Recordings of the three T cells were performed in the same ganglion in succession (single cell intracellular recordings). **(B)** Boxplots of first spike latencies of the same cell for ten trials.
