# Supplementary material for: Synaptic input and temperature influence sensory coding in a mechanoreceptor
Source: Frontiers journal article supplement (doi:10.3389/fncel.2023.1233730), 2023-09-12
Supplement: Image_2.pdf [file Image_2.pdf]

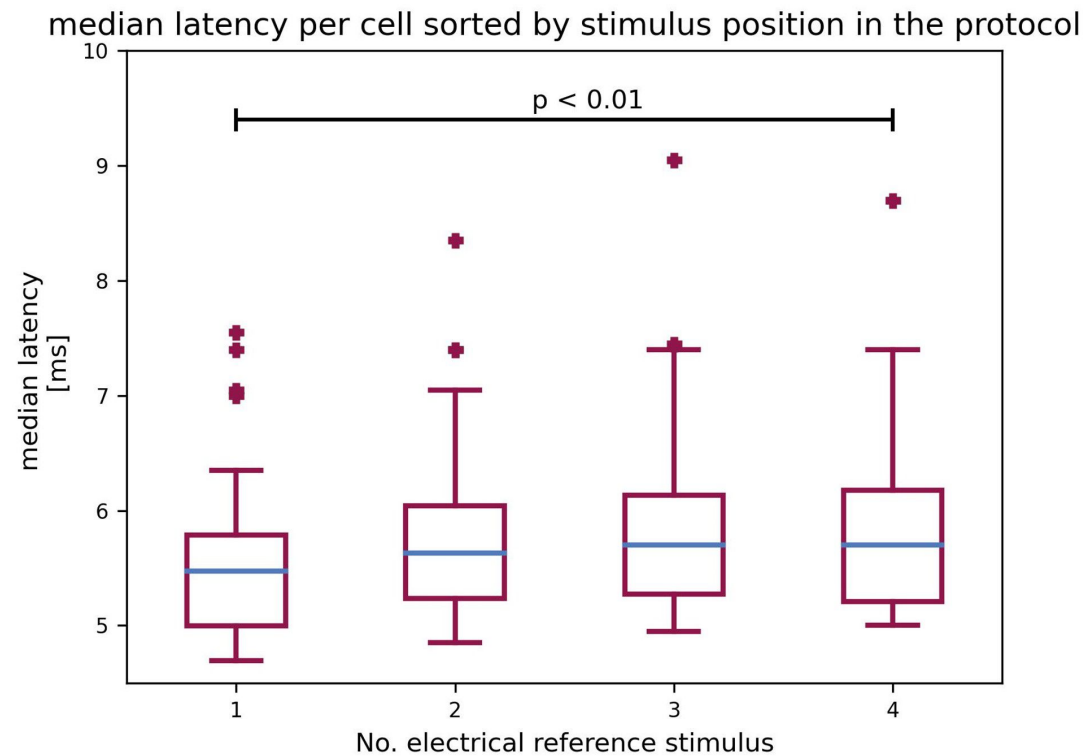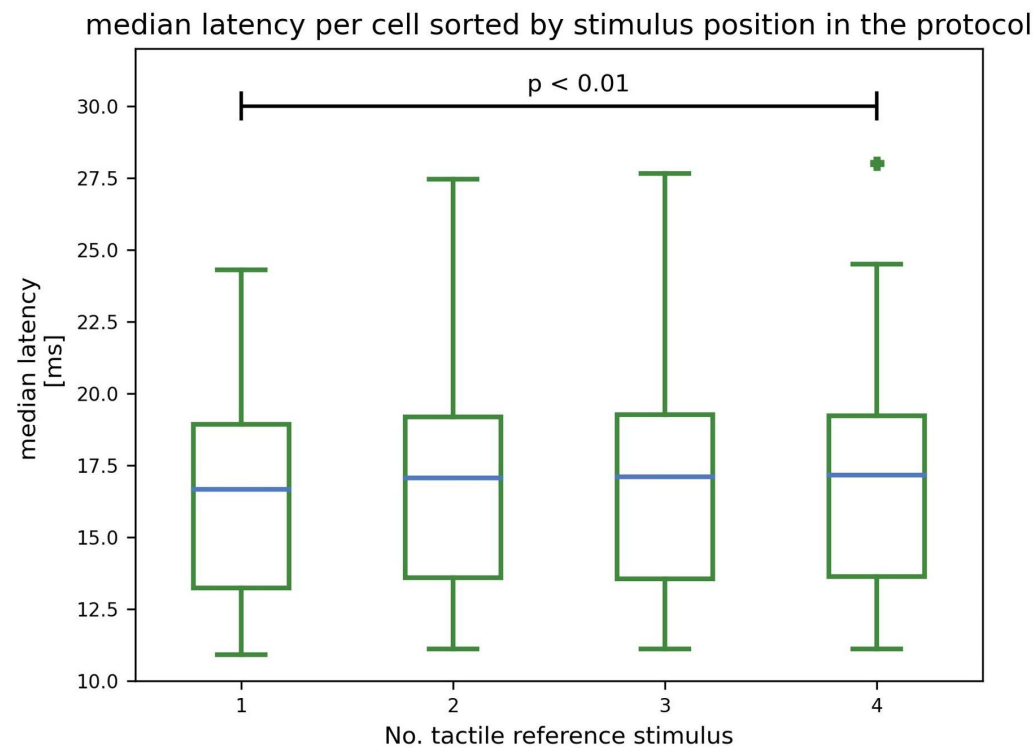

**Supplementary Figure 2:** first spike latencies of both spikes elicited in the skin and in the soma increased over the course of the four *reference* stimuli (electrical:  $z = 4.88$ ,  $p < 0.01$ , tactile:  $z = 3.94$ ,  $p < 0.01$ ).
